## 1 **Understanding the relationship between dispersal and range size**

2 Adriana Alzate<sup>1,2</sup>, Renske E. Onstein<sup>1,2</sup>

3 <sup>1</sup> German Centre for Integrative Biodiversity Research (iDiv) Halle-Jena-Leipzig, Puschstr. 4, D-04103 Leipzig, Germany

4 <sup>2</sup> Leipzig University, Ritterstraße 26, 04109 Leipzig, Germany

5

### 6 **Abstract**

7

8 Understanding what drives the vast variability in species range size is still an outstanding question.  
9 Among the several processes potentially affecting species ranges, dispersal is one of the most  
10 prominent hypothesized predictors. However, the theoretical expectation of a positive dispersal-  
11 range size relationship has received mixed empirical support. Here, we synthesized results from  
12 84 studies to investigate in which context dispersal is most important in driving species range size.  
13 We found that dispersal traits – proxies for dispersal ability – explain range sizes more often in  
14 temperate and subtropical regions than in tropical regions, when considering multiple components  
15 of dispersal, and when investigating a large number of species to capture dispersal and range size  
16 variation. In plants, positive effects of dispersal on range size were less often detected when  
17 examining broad taxonomic levels. In animals, dispersal is more important for range size increase  
18 in ectotherms than in endotherms. Our synthesis emphasizes the importance of considering  
19 different aspects of the dispersal process -departure, transfer, settlement-, niche aspects and  
20 evolutionary components, like time for range expansion and past geological-environmental  
21 dynamics. We therefore call for a more integrative view of the dispersal process and its causal  
22 relationship with range size.

23

## 24 **Introduction**

25

26 Species geographical range is a fundamental unit in macroecology and is a main predictor of  
27 extinction risk across organisms (Brown et al. 1996, Purvis et al. 2000, Chichorro et al. 2019). As  
28 the distribution of a species provides important information on their ecology and evolution,  
29 understanding what drives the vast variability in species range size has for long been of interest to  
30 paleontologist, biogeographers, macroecologists and evolutionary biologists (Brown et al. 1996,  
31 Gaston 2003, Gaston 2009, Gaston & Fuller 2009). Several mechanisms might underlie species  
32 geographical ranges, such as environmental and physical constraints, differences in niche  
33 requirements, population abundance, latitudinal gradients, differences in body size or trophic level,  
34 colonization-extinction dynamics, species age and dispersal ability (Gaston 2003). Although all  
35 these mechanisms can simultaneously interact to produce the empirical range sizes, dispersal has  
36 received the most interest, likely because it is one of the most prominent processes affecting range  
37 size (Hanski et al. 1993, Lester et al. 2007, Sheth et al. 2020). However, despite major efforts to  
38 link dispersal ability to range size, the theoretical expectation of a positive dispersal-range size  
39 relationship has received mixed empirical support both among and within taxa (Lester et al. 2007,  
40 Luiz et al. 2013, Alzate et al. 2019a, Sheth et al. 2020).

41 Here we define dispersal as any movement of individuals or propagules potentially leading to gene  
42 flow across space (Ronce 2007, Clobert et al. 2012). Both theoretical and experimental work have  
43 shown that dispersal can positively affect the mechanisms that allow attaining large geographical  
44 ranges (Holt 2003, Holt et al. 2005, Sexton et al. 2009, Alzate et al. 2019b). For instance, dispersal  
45 promotes range expansion by facilitating the colonization of new habitats and promoting local  
46 adaptation (Holt & Gomulkiewicz 1997, Alzate et al. 2019b). Dispersal also prevents range  
47 contraction by decreasing extinction risk and allowing populations to persist in suboptimal habitats  
48 (Hufbauer et al. 2015, Alzate et al. 2019b), as it provides demographic (Brown & Kondric-Brown  
49 1977) and genetic (Holt & Gomulkiewicz 1997) rescue. Furthermore, simulation models (spatial  
50 explicit neutral models) predict a positive effect of dispersal on species range size (Rangel-Diniz-  
51 Filho 2005, Alzate et al. 2019c). An outstanding question is therefore why positive effects of  
52 dispersal on range size are found in some cases, but not in others.

53 Discrepancies between expected and observed dispersal-range size relationships might emerge for  
54 different reasons. Firstly, studies differ in their dispersal ‘definitions’ and therefore also differ in  
55 which phenotypic traits are considered to be associated to dispersal ability. Which dispersal-related  
56 traits to choose is not a trivial question, particularly because dispersal and dispersal distance are  
57 emergent properties (complex traits) resulting from the interactive effects of various dispersal-  
58 related traits (e.g., morphology, physiology, behavioural and life history traits), which are highly  
59 dependent on the type of organism studied (Ronce 2007, Bonte et al. 2012, Matthysen 2012, Ronce  
60 & Clobert 2012, Travis et al. 2012, Sheth 2020, Green et al. 2021). Moreover, dispersal can occur  
61 at different life stages (e.g., seeds, eggs, juveniles, adults), it is composed by three phases including  
62 departure (i.e., decision to leave the old habitat), transfer (i.e., displacement from the old to a new  
63 habitat) and settlement (i.e., arrival and settlement in the new habitat), and can be shaped by  
64 external factors and evolve (Ronce 2007, Matthysen 2012). Although dispersal kernels are in  
65 general good proxies for dispersal abilities across species, there are still difficulties to measure the  
66 tail of the kernel, which is of major importance when scaling up to distribution dynamics (Clobert  
67 et al. 2012). Therefore, different measures of dispersal may capture different components of the  
68 dispersal process, and may thus affect the resulting dispersal-range size relationship.

69 Secondly, true biological differences between study organisms might determine how dispersal  
70 correlates with range size. For instance, it is possible that the dispersal-range size relationship  
71 differs between active (e.g., reptiles, birds, mammals) and passive dispersers (e.g., plants, diatoms,  
72 marine molluscs), because dispersal (the transfer phase) for passive dispersers is outside the  
73 control of the individual, as it depends on external forces (e.g., currents, wind, gravity, other  
74 organisms) with a high stochastic component (Matthysen 2012). Moreover, the nature of the  
75 dispersal medium of marine and terrestrial realms can lead to differences in dispersal ability  
76 between terrestrial and marine organism. In marine systems, passive rather than active dispersal is  
77 favoured, which may lead to fewer dispersal-related adaptations in marine than in terrestrial  
78 systems (Burgess et al. 2005). The higher connectivity between marine habitats may also erase the  
79 link between dispersal ability and range sizes (Mora et al. 2012). In terrestrial systems, dispersal  
80 may be more difficult without specialised adaptations (such as wings to fly, fleshy fruits to attract  
81 animal dispersers, etc.) (Burgess et al. 2015). In addition, human activities can uncouple the  
82 dispersal-range size relationship by decreasing species distributions (Webb & Gaston 2000). This  
83 might be more common on terrestrial than in marine systems, where large scale human impact has

84 a longer history. Similarly, dispersal may be less limiting in endotherms than ectotherms, because  
85 endotherms possess broader thermal niches and higher thermal tolerances due to high metabolic  
86 rates compared to ectotherms, facilitating settlement. Even though endo- and ectotherms might not  
87 differ in the dispersal capacities required during the transfer phase of dispersal, endothermy might  
88 have an advantage during the settlement phase. Thus, physiological tolerance rather than dispersal  
89 ability may in some cases be the limiting factor when it comes to range size (Pie et al. 2021).

90 Thirdly, evolutionary history may affect the current dispersal-range size relationship by  
91 determining time and potential for (past) range expansion, or the evolution of dispersal-related  
92 traits that facilitated past long-distance dispersal (Onstein et al. 2019). For example, range size is  
93 likely to vary with species age because species need time to expand their range (Willis 1922, Webb  
94 & Gaston 2000, Gaston 2003), and the dispersal-range size relationship may thus be obscured  
95 when studying species of different ages. Furthermore, past climate changes (e.g., since the last  
96 glacial maximum), population connectivity, and availability of suitable settlement environments,  
97 may have affected the rate of range size expansion (e.g., ‘Reid's Paradox’), and may explain  
98 distinct dispersal-range size relationships across biogeographical realms and climate zones that  
99 differ in their glaciation history, for example (Svenning & Skov 2004, Svenning et al. 2008).

100 Lastly, besides biological and evolutionary reasons, intrinsic differences between studies, such as  
101 study design, methodology, data, or analytical approach might explain absence of a relationship  
102 between dispersal and range size. Studies examining how dispersal affects range size differ in  
103 taxonomic scope (e.g., ‘genus’, ‘family’, ‘phylum’), taxonomic unit of analysis (e.g., at ‘genus’ or  
104 ‘species’ level), the measure of species range size (e.g., ‘extent of occurrence’ or ‘area of  
105 occupancy’), range completeness (e.g., ‘partial’ or ‘complete’ measures of range size), and the  
106 number of considered species and dispersal-related traits to capture variation in the dispersal-range  
107 size relationship. For example, range size measures can under- or overestimate true range sizes by  
108 including or excluding discontinuities in the spatial distribution of taxa. Similarly, high taxonomic  
109 units of analysis (e.g., ‘genus’ or ‘family’ instead of ‘species’) ignores within-clade variation in  
110 dispersal. The benefit of using comprehensive data, that is, bigger areas that include complete  
111 ranges, over partial data (i.e., smaller areas that do not include complete ranges) has been shown  
112 for understanding the body size - range size relationship in animals, with more consistently positive  
113 relationships when using comprehensive data (Gaston & Blackburn 1996).

114 Despite all possible caveats and warnings about several of these problems (Blackburn & Gaston  
115 1998, Alzate et al. 2019a, Johnson et al. 2021), a comprehensive methodological framework to  
116 study dispersal and range size is missing. Here we performed a systematic review to investigate  
117 the causes of variation in the dispersal-range size relationship by collating 478 dispersal-range size  
118 relationships from 86 independent studies. Firstly, we investigated and synthesized the spread of  
119 evidence for the dispersal-range size relationship between regions, realms and clades. Secondly,  
120 we quantified how differences between studies regarding dispersal and range size characteristics  
121 related to transfer, settlement and evolution, and potential methodological differences (range size  
122 definitions, spatial corrections and taxonomy) can affect the overall dispersal-range size  
123 relationship (Table 1). Finally, we discuss these results in the context of the complexity of the  
124 dispersal process – from departure, to transfer, to settlement.

125

126 **Table 1.** Moderator candidates of the dispersal-range size relationship as synthesized in this study. Variables were  
 127 classified into six groups depending on their hypothesized effect on the dispersal-range size relationship:  
 128 departure/transfer variables that directly affect movement/transfer of species, settlement variables or corrections that  
 129 influence the potential and realized niche space, time variables or corrections related to evolutionary history and past  
 130 dynamics that may influence range size, and three methodological type variables that may bias the inference of the  
 131 dispersal-range size relationship. Description of each variable and the prediction of why and how it potentially  
 132 influences the dispersal-range size relationship is provided.

| Group of variables                                                                                             | Variable                                                                                                      | Type and levels                              | Influences the dispersal-range size relationship because...                                                                                                                                                                                                         |                                                                                                                                                                                                                                                                                                                                         |
|----------------------------------------------------------------------------------------------------------------|---------------------------------------------------------------------------------------------------------------|----------------------------------------------|---------------------------------------------------------------------------------------------------------------------------------------------------------------------------------------------------------------------------------------------------------------------|-----------------------------------------------------------------------------------------------------------------------------------------------------------------------------------------------------------------------------------------------------------------------------------------------------------------------------------------|
| <br>departure/transfer        | Clade                                                                                                         | categorical: plants, animals                 | ...plants, as sessile and passive dispersers, may be more affected by dispersal limitation than animals.                                                                                                                                                            |                                                                                                                                                                                                                                                                                                                                         |
|                                                                                                                | Dispersal type                                                                                                | categorical: passive, active, mixed          | ...passive dispersers, being dependent on external sources for their dispersal, may be more affected by dispersal limitation than active dispersers.                                                                                                                |                                                                                                                                                                                                                                                                                                                                         |
|                                                                                                                | Realm                                                                                                         | categorical: terrestrial, marine, freshwater | ...species in marine systems are less affected by dispersal limitation than those in terrestrial/freshwater systems, because marine systems might have higher connectivity.                                                                                         |                                                                                                                                                                                                                                                                                                                                         |
|                                                                                                                | <br>settlement               | Temperature regulation                       | categorical: endotherm, ectotherm                                                                                                                                                                                                                                   | ...endotherms are less affected by niche limitation than ectotherms due to broad thermal tolerances, allowing them to attain and persist in larger ranges more easily.                                                                                                                                                                  |
| Biogeographical region size                                                                                    |                                                                                                               | continuous                                   | ...species in regions with less available (niche) space (e.g., smaller regions) may be less affected by dispersal limitation than species with more space available, because in smaller regions even less dispersive species may have attained maximum range sizes. |                                                                                                                                                                                                                                                                                                                                         |
| Habitat correction                                                                                             |                                                                                                               | categorical: single habitat, yes, no.        | ...available niche space rather than colonization ability may be the limiting factor when it comes to dispersal.                                                                                                                                                    |                                                                                                                                                                                                                                                                                                                                         |
| Available space correction                                                                                     |                                                                                                               | categorical: unique site, yes, no.           | ...dispersal limitation and (maximum) range sizes may differ between regions or habitats of difference sizes (also see 'Biogeographical region size' for specific predictions).                                                                                     |                                                                                                                                                                                                                                                                                                                                         |
| <br>evolutionary history    | Species age                                                                                                   | categorical: considered, no considered       | ...time for range expansion rather than dispersal ability may be the limiting factor when it comes to understanding differences in range sizes across species.                                                                                                      |                                                                                                                                                                                                                                                                                                                                         |
|                                                                                                                | Phylogenetic correction                                                                                       | categorical: considered, not considered      | ...dispersal ability and range size may be phylogenetically and temporally correlated, thus correcting for phylogenetic dependence might reduce or remove the effect of evolution on the relationship.                                                              |                                                                                                                                                                                                                                                                                                                                         |
|                                                                                                                | <br>past dynamics          | Latitude                                     | categorical: tropical, subtropical, temperate, multiple latitudes                                                                                                                                                                                                   | ...species in tropical regions may be less affected by dispersal limitation because of long-term environmental stability (e.g., lack of glaciations), thus more time for range expansion. Tropical species may therefore have had more opportunity to attain and persist in their maximum range sizes, compared with temperate regions. |
|                                                                                                                |                                                                                                               | Latitude correction                          | categorical: unique latitudinal zone, yes, no.                                                                                                                                                                                                                      | ...dispersal limitation and (maximum) range sizes may differ between latitudes (also see 'Latitude' for specific predictions).                                                                                                                                                                                                          |
| <br>dispersal approximation | Number of dispersal-related traits                                                                            | continuous                                   | ...the dispersal process may not be accurately approximated when including only few traits that lack the components of dispersal most relevant for range expansion.                                                                                                 |                                                                                                                                                                                                                                                                                                                                         |
|                                                                                                                | <br>range size definition  | Range size metric                            | categorical: extent of occurrence, area of occupancy                                                                                                                                                                                                                | ...area of occupancy can underestimate range size by excluding discontinuities in the spatial distribution of taxa, resulting in a mismatch between range size and dispersal.                                                                                                                                                           |
|                                                                                                                |                                                                                                               | Range size completeness                      | categorical: partial, complete                                                                                                                                                                                                                                      | ...partial ranges may underestimate true range sizes.                                                                                                                                                                                                                                                                                   |
|                                                                                                                | <br>taxonomic delimitation | Taxonomic unit                               | categorical: species, non-species                                                                                                                                                                                                                                   | ...using higher taxonomic levels as units of analysis (e.g., 'genus', 'family') ignores species-level variation in dispersal ability and range size.                                                                                                                                                                                    |
|                                                                                                                |                                                                                                               | Taxonomic breadth                            | categorical: genus, family, order, class, phylum/division                                                                                                                                                                                                           | ...identifying universal dispersal-related traits associated with range size at very broad taxonomic levels (e.g., 'phylum', 'division') may be difficult.                                                                                                                                                                              |
|                                                                                                                |                                                                                                               | Number of species                            | continuous                                                                                                                                                                                                                                                          | ... a higher number of species increases statistical power, captures a higher trait and range size variation, and may be less biased by incomplete sampling of species within the study system.                                                                                                                                         |

## 134 **Literature search methodology**

135 We conducted a systematic search for studies that examined the relationship between dispersal-  
136 related traits and range size. We used Web of Science and the Core Collection database with the  
137 key words search criteria "dispers\*" OR "dispers\* trait" AND "range size" OR "species range" OR  
138 "geogra\* range". We restricted our search to scientific articles published in English. Our search  
139 yielded a total of 3,139 scientific articles. After a first screening based on article' titles and  
140 abstracts, we discarded studies that were clearly irrelevant (e.g., studies in other fields like physics,  
141 studies that do not formally assess the dispersal - range size relationship, studies on single species,  
142 studies that use genetic metrics as proxies of dispersal, studies on range expansion or range shifts).  
143 We assessed 104 articles for eligibility by reading the full-text and we further excluded  
144 perspectives and review articles or studies that did not include empirical tests (i.e., strictly  
145 theoretical papers; see Table S1-S4 in Database). After cross-referencing and including newly  
146 published articles, 86 studies and 478 relationships between dispersal-related traits and range size  
147 were included in our systematic review. For an overview of the search methodology, see the Prisma  
148 diagram (Fig. S1 Suppl. Mat.).

## 149 **Data extraction and collection**

150 For each relationship reported in the studies, we gathered information on 17 moderators potentially  
151 responsible for differences in the dispersal - range size relationship across studies (Table 1). We  
152 classified these moderators into six groups of variables related to: 1) departure/transfer stage of  
153 dispersal, 2) settlement stage of dispersal, 3) evolution, 4) dispersal approximation, 5) range size  
154 definitions, and 6) taxonomic delimitation (see Table 1 for the description of the variables and  
155 predictions).

156 To assess which traits may be most suitable to approach the dispersal process and are most relevant  
157 for increasing range size, we reported the effect of each dispersal-related trait included in each  
158 model examining the dispersal-range size relationship (Table 2). We classified this trait overview  
159 by realm (terrestrial vs. marine) and taxon (clade), due to potential differences between these  
160 systems with respect to dispersal-limiting factors (Table 1) and thus their relationship of dispersal-  
161 related traits to range size (Table 2). To examine the effect of the moderators on the dispersal-  
162 range size relationship for each relationship, we reported the overall effect of dispersal on range  
163 size (see Table S5 in Database). When the study reported two or more dispersal-related traits with

164 opposite effects on range size, the overall effect was treated as ‘neutral’. When the study included  
165 several dispersal-related traits, some with neutral effects and some with positive effects, we treated  
166 the overall effect as ‘positive’, while we treated the overall effect as ‘negative’ when the opposite  
167 happened.

168 For the calculation of biogeographical region size (which may influence the opportunity for range  
169 expansion due to available area) we used GIS layers (Spalding et al. 2007, Olson et al. 2004, and  
170 Natural Earth). Among the methodological features, the number of dispersal-related traits refers  
171 to the number of traits included as independent factors (e.g., body size, diaspore size, plant height)  
172 or combined in a single factor as a complex metric of dispersal (e.g., hand-wing index, PCA axis,  
173 relative measurements). For instance, hand-wing index is used as a single factor that is composed  
174 of two dispersal-related traits (wing length and first-secondary length). Taxonomic breadth, the  
175 lowest taxonomic level that includes all species in the study, was assigned based on the species  
176 lists provided in the studies. Relationships using ‘family’ and ‘superfamily’ taxonomic levels were  
177 recoded as ‘family’. Similarly, ‘order’ and ‘suborder’ were recoded as ‘order’, and ‘phylum’,  
178 ‘division’, ‘subphylum’ and ‘subkingdom’ were recoded as ‘phylum-division’ level. 13  
179 relationships could not be assigned to a particular taxonomic breadth, thus excluded from statistical  
180 analyses.

181



182 **Table 2.** Summary of the observed relationship between dispersal-related traits and range size  
 183 based on 86 studies and 478 relationships. The relative proportion of the direction of the  
 184 relationships is indicated (positive: green, neutral: brown, negative: red) for each realm (marine,  
 185 terrestrial, freshwater) and taxon or clade (fish, echinoderms, crustaceans, molluscs, amphibians,  
 186 birds, mammals, insects, vascular plants, liverworts, mycorrhiza, testudines, trematodes, diatoms).  
 187 The number of relationships assessed for each taxon is indicated with *N*. In case of categorical  
 188 variables, the direction of the trait states is indicated below the trait, e.g., ‘pelagic > non-pelagic’  
 189 means that species with pelagic eggs have larger range sizes than those with non-pelagic eggs, and  
 190 this directional relationship was found in 2 out of 3 cases.

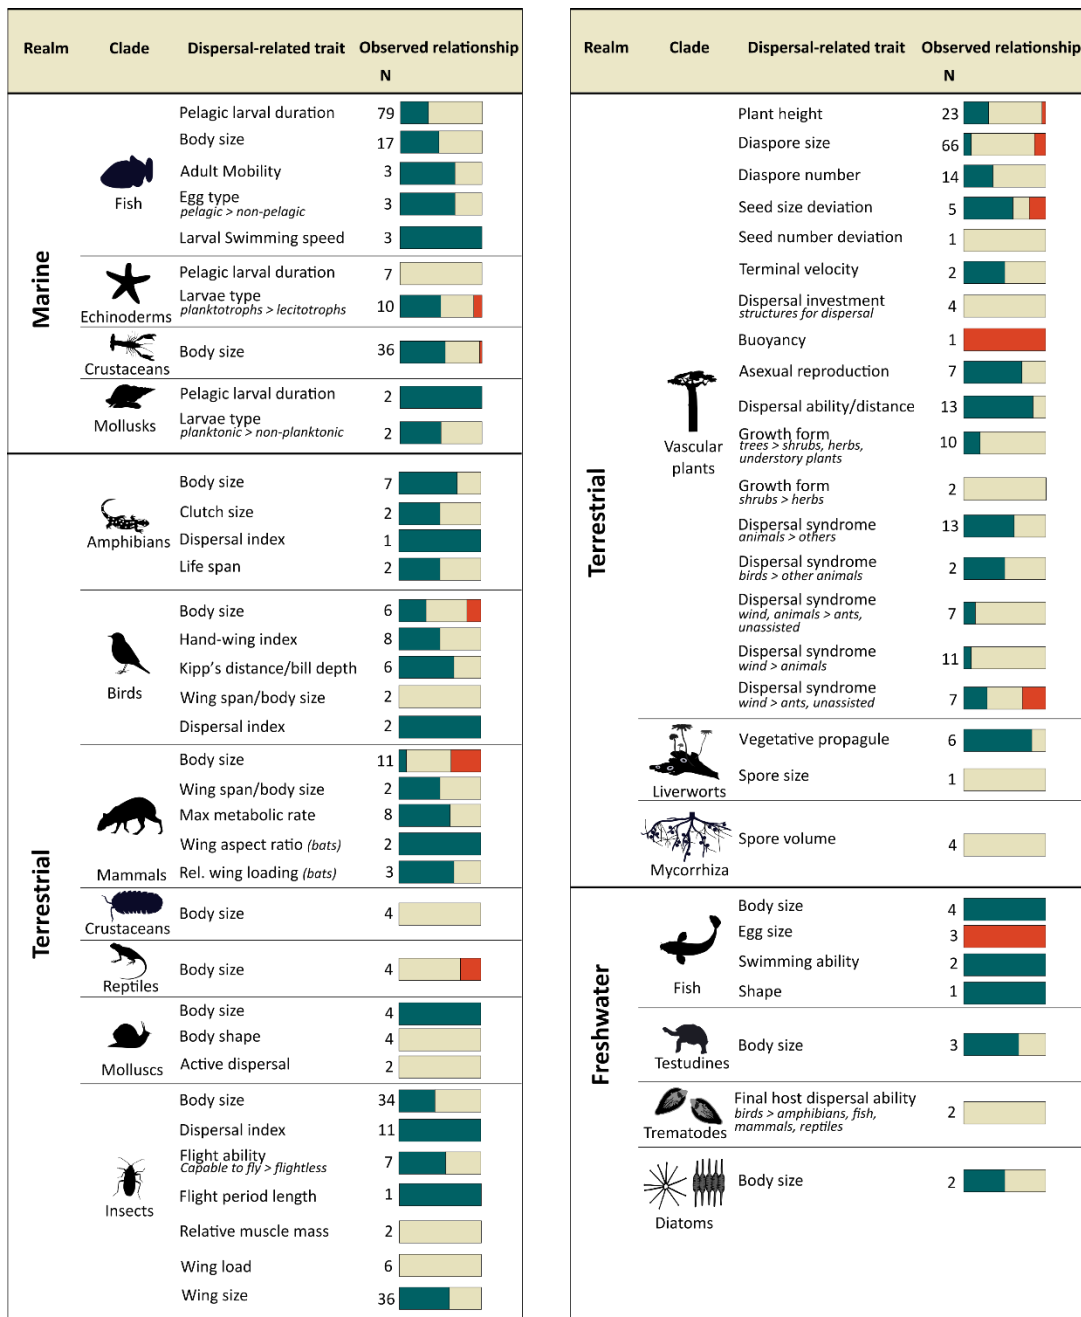

## 192 **Moderators affecting the dispersal-range size relationship**

193 To investigate how differences between dispersal processes, evolutionary history, and study design  
194 affect the overall dispersal-range size relationship, we fitted a Generalized Linear Mixed Model  
195 (GLMM) with Binomial error distribution (link probit) and study ID as a random effect. To test  
196 the effect of the 17 moderators (Table 1) on the presence or absence of a dispersal-range size  
197 relationship, we performed a forward model selection procedure. We started by fitting a model  
198 with only random effects, and sequentially added significant fixed factors until reaching a final  
199 model. To decide which variable to include in the model in every time step, we tested for the  
200 significance of all fixed factors that can be added to the base model (i.e., all factors that are not  
201 already included in the model at that point) using a log-likelihood ratio test to identify the most  
202 significant variable to add (and  $p < 0.05$ ). Each model was tested for collinearity using the *vif*  
203 function from the ‘car’ R package (Fox & Weisberg 2019). If a new added variable was collinear  
204 with one already selected in the model, the new variable was excluded from the selection  
205 procedure. We retained variables with a generalized variance inflation factor (GVIF) smaller than  
206 2, which is the square root of the threshold value for the standard VIF (VIF = 5), and indicates  
207 limited collinearity. We used generalized linear mixed-effects models in a Bayesian setting  
208 (*bglmer* function from R package ‘blme’; Dorie et al. 2021).

209 We only included positive and neutral relationships as response variables, negative relationships  
210 were excluded as they were too few to perform an analytical test on (10 out of 478 relationships  
211 in total). All continuous variables (number of dispersal-related traits, biogeographical region size  
212 and number of species) were rescaled from 0 to 1. Also, 13 relationships for clades that were only  
213 assessed in a single study (mycorrhizal fungal, diatoms and liverworts) were excluded as they  
214 could not be placed in any of the two broad clades (animals, vascular plants) assessed here. 36  
215 relationships were also excluded as did not report number of species and 13 were excluded as they  
216 missed information on highest taxonomic level. The final model included in total 410 relationships  
217 from 81 studies.

218 In addition to a global model including all relationships, we ran separate analyses for the two broad  
219 clades: animals and vascular plants. In animals, we also included the specific taxon (e.g., birds,  
220 mammals, fish, insects) as a factor related to the departure/transfer dispersal process, as these  
221 clades may differ in their dispersal ability based on certain biological features (e.g., presence or

222 absence of wings). We then excluded invertebrates and trematodes, the former because it cannot  
223 be assigned to a specific taxonomic group and the latter, because it only has two reported  
224 relationship from a single study (Thieltges et al. 2011). Because temperature regulation and  
225 latitude were correlated, we ran two separated models including either temperature regulation or  
226 latitude. We recoded ‘tropical’ and ‘multiple latitude’ as ‘tropical-multiple latitude’, and  
227 ‘subtropical’ and ‘temperate’ as ‘subtropical-temperate’ for the model including latitude, due to  
228 complete separation. In plants, we excluded factors that lacked variation within plant studies, such  
229 as dispersal type (passive vs. active), temperature regulation, realm (only studies on terrestrial  
230 plants), species age (only one study included this), taxonomic unit, and the taxonomic breadth  
231 level ‘class’. Latitude was recoded similarly as done for animals. Model fitting and selection for  
232 both subsets was done as described above for the complete data-set.

233

### 234 *General patterns*

235 Most of the studies assessing the dispersal-range size relationship have focused on marine and  
236 terrestrial systems (48 and 31 studies, respectively), whereas freshwater systems have received  
237 much less attention (only 7 studies; Fig. 1,2). Regarding taxa, most of studies have focused on  
238 vascular plants, fishes, and insects (24, 17 and 14 studies respectively; Fig. 1), whereas dispersal-  
239 range size relationships in bryophytes (liverworts), diatoms, trematodes and mycorrhiza fungal (all  
240 with a single study) have barely been studied. The majority of studied relationships (55%) showed  
241 a neutral effect of dispersal on range size, 40% of relationships were positive and only few (5%)  
242 were negative (Fig. 2). While for most of the taxa we did not find a consistent positive association  
243 between range size and dispersal, for molluscs, amphibians and birds we found more often positive  
244 effects of dispersal on range size than neutral effects (Fig. 1). Marine, terrestrial and freshwater  
245 realms showed similar proportions of positive and neutral relationships (Chi-squared test = 0.078,  
246  $p = 0.67$ , Fig. 1). Interestingly, plants showed a lower proportion of positive relationships than  
247 animals (Chi-squared test = 10.72,  $p = 0.001$ , Fig. 1).

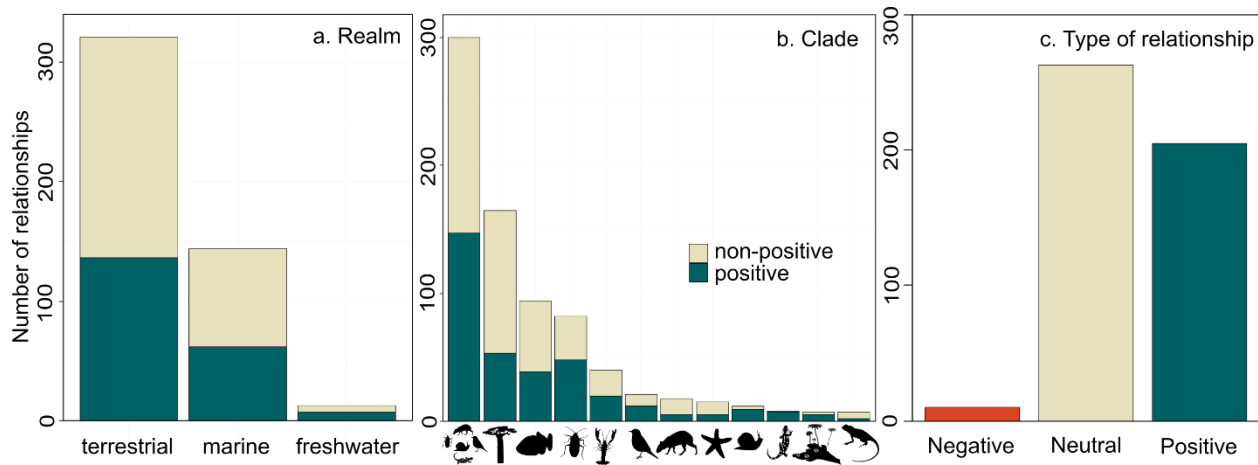

248

249 **Fig. 1.** Overview of positive and non-positive relationships between dispersal-related traits and  
250 range size examined in this review. The number of positive and non-positive relationships is  
251 indicated for (a) each realm (terrestrial, marine, freshwater), (b) clade and specific taxonomic  
252 groups (animals, plants, fish, insects, crustaceans, birds, mammals, echinoderms, molluscs,  
253 amphibians, liverworts, reptiles) and (c) total. Mycorrhiza, trematodes, diatoms and invertebrates  
254 were not included here because they had less than four reported relationships (all non-positive).

255

256 There is also a clear spatial structure in study location (Fig. 2). For terrestrial systems, most of the  
257 studies have been performed in the palearctic region (23 studies), followed by studies including  
258 multiple regions (i.e., studies that include more than one region, including global studies) (15  
259 studies), whereas much less attention has been given to neotropical and paleotropical regions  
260 (including the Madagascar region). For marine systems, 32% of the studies (10 studies) examined  
261 multiple regions, followed by studies in the Indo-Pacific and the Tropical Eastern Pacific (26%, 8  
262 studies each), whereas the Atlantic and Mediterranean regions were much less studied (4 and 1  
263 study respectively, Fig. 1). For freshwater systems, only 2 studies have been performed for  
264 multiple regions, the remaining 5 studies have only considered Nearctic a Palearctic regions (2 and  
265 3 studies, respectively).

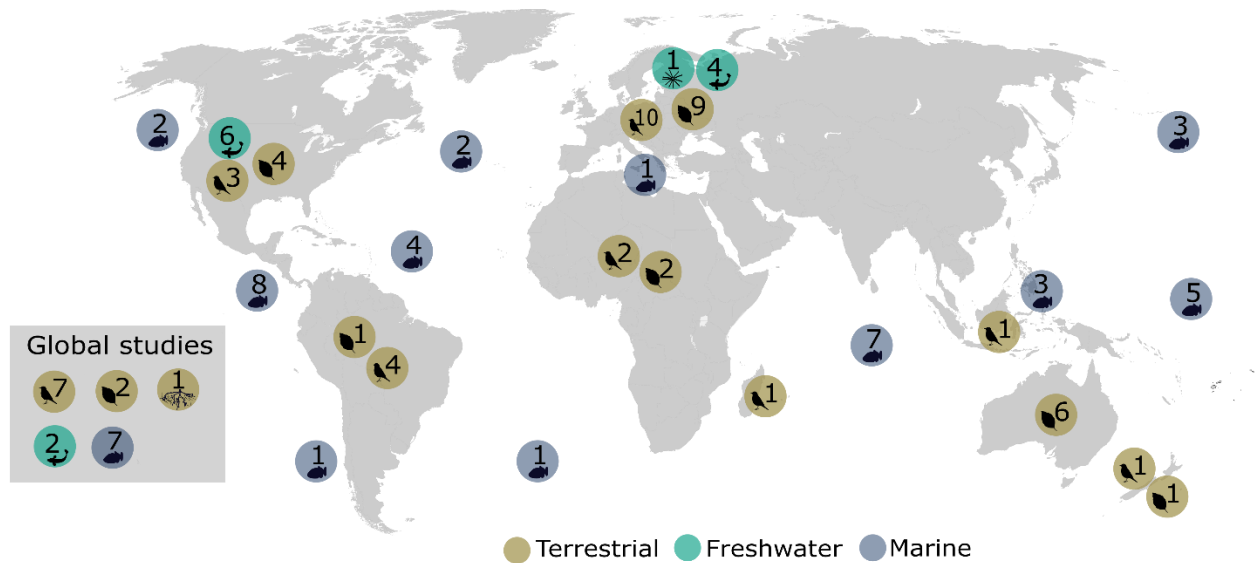

266

267 **Fig. 2.** Geographical distribution of studies examining the effect of dispersal on range size. We  
268 evaluated this for different clades: animals (fish and bird silhouettes), plants (leaf silhouette),  
269 diatoms (diatom silhouette) and mycorrhiza (root silhouette), and realms: terrestrial (brown),  
270 freshwater (green) and marine (blue). Except for global studies, studies that were carried out in  
271 more than one region are included in each region separately. Geographic location is separated  
272 according to the geographical region the study was carried out in, following the Wallace  
273 classification for terrestrial and freshwater organisms and marine ecoregions of the world-MEOW  
274 for marine organisms.

275

## 276 **Dispersal-related traits**

277 Studies used a wide range of traits as proxies for dispersal ability, which, unsurprisingly, vary  
278 substantially with the taxon and system studied (Table 2). For marine animals, traits that allow  
279 dispersal during the larval stage (which is often pelagic) are most commonly used. Type of larvae  
280 (e.g., pelagic vs. non-pelagic) and egg (e.g., pelagic vs. non-pelagic), and the duration of the  
281 pelagic larval stage have generally been considered as proxies of dispersal for fishes, echinoderms  
282 and molluscs. Body size has also been used as a proxy for dispersal for crustaceans and fishes. For  
283 terrestrial animals, body size has been the main trait used as a proxy for dispersal ability. In  
284 addition, traits related to flight ability have been used in taxa for which flight is present (e.g., birds,  
285 bats, insects), either as a binary trait (presence vs. absence of wings) or a continuous variable  
286 (hand-wing index, wing load or size) reflecting flight potential (Table 2). Life history traits (e.g.,

287 clutch size, life span) have mostly been used in amphibians, whereas metabolic rate has been used  
288 as a dispersal proxy in mammals. For vascular plants, proxies of dispersal are related to the  
289 characteristics of the diaspore (e.g., seed size and number) and dispersal mechanism (i.e., dispersal  
290 syndrome, such as wind, water or animal). In freshwater animals, body size is also a common  
291 proxy of dispersal (for fish, testudines and diatoms). Dispersal in parasitic trematodes is assumed  
292 to be linked to the dispersal ability of the host (e.g. fish, mammals, birds). See Appendix 1 in  
293 Suppl. Mat. for an extended description.

294

### 295 **Moderators of the dispersal-range size relationship**

296 The final model, including both plants and animals, explained 41% of the variation (50%  
297 considering random effects) and identified four moderators as main factors explaining the  
298 differences in the dispersal-range size relationship between studies (Fig. 3). Specifically, studies  
299 that included multiple dispersal-related traits, that were carried out in temperate or subtropical  
300 regions or that included a larger number of species, showed significantly more positive dispersal-  
301 range size relationships than studies including fewer dispersal-related traits, that were carried out  
302 in tropical regions (or multiple regions), or that included fewer species in the analysis (Fig. 3,  
303 Table S2, S3 Suppl. Mat.). Furthermore, studies carried out at higher taxonomic breadth, such as  
304 ‘phylum’ or ‘division’ showed fewer positive relationships between dispersal and range size than  
305 studies carried out for a particular ‘class’, ‘order’ or ‘family’.

306 When examining the relationship between dispersal and range size for animals and plants  
307 separately, we found that the factors responsible for a positive dispersal-range size relationship  
308 differed between those broad clades (Fig. 3, Table S1, S2 Suppl. Mat.). In animals, similar results  
309 as for the global dataset were found, with the number of dispersal-related traits and number of  
310 species positively contributing to the dispersal-range size relationship. In addition, we found that  
311 studies on endotherms showed fewer significant, positive associations between dispersal and range  
312 size than on ectotherms (Fig. 3, Table S1, S2 Suppl. Mat.). In plants, taxonomic breadth remained  
313 important as a variable to explain the positive dispersal-range size relationship, with studies carried  
314 out at ‘division’ level or higher showing fewer positive dispersal-range size relationships than  
315 studies carried out at the ‘family’ level (Fig. 3, Table S1, S2 Suppl. Mat.).

316 It should be noted that a large sample size may increase the probability of detecting false positives,  
317 which could explain our finding that number of species and number of dispersal-related traits  
318 affects the dispersal-range size relationship. Although, theoretically, this could go in both a  
319 positive or negative direction in terms of dispersal-range size relationships. The distribution of  
320 species numbers used in the studies is strongly right-skewed: more than 90% of the studied  
321 relationships included less than 500 species (380 relationships, Fig S2 Suppl. Mat.). We performed  
322 a sensitivity analysis to explore the effect of outliers for both the number of species and number  
323 of dispersal-related traits on our findings. Nevertheless, the positive effect of species number on  
324 the dispersal-range size relationship remains when including only studies with less than 500  
325 species, but not when only including studies with less than 100 species (Table S3 Suppl. Mat.).  
326 Importantly, the positive effect of including multiple dispersal-related traits remained after  
327 excluding possible outliers (studies with 10 dispersal-related traits; Table S3 Suppl. Mat.).  
328 Alternatively, our result may reflect serendipity, because the more traits a study includes, the  
329 higher the chance becomes that one of those traits relates to range size. We tested whether this is  
330 the case by comparing the relationship between the overall dispersal-range size relationship and  
331 the number of dispersal-related traits vs. the relationship between the overall dispersal-range size  
332 relationship and the number of dispersal ‘factors’ (one factor can be composed of several dispersal-  
333 related traits) included in the models (Table S4 Suppl. Mat.). Interestingly, although the effect of  
334 the number of dispersal-related traits on the dispersal-range size relationship is significantly  
335 positive, the number of dispersal ‘factors’ included in each relationship does not have a significant  
336 effect (Table S4 Suppl. Mat.). This means that using multiple dispersal-related traits likely results  
337 in a better approximation of the dispersal process and/or a higher probability to capture traits that  
338 are relevant for dispersal, increasing the chance to find a positive dispersal-range size relationship.

339

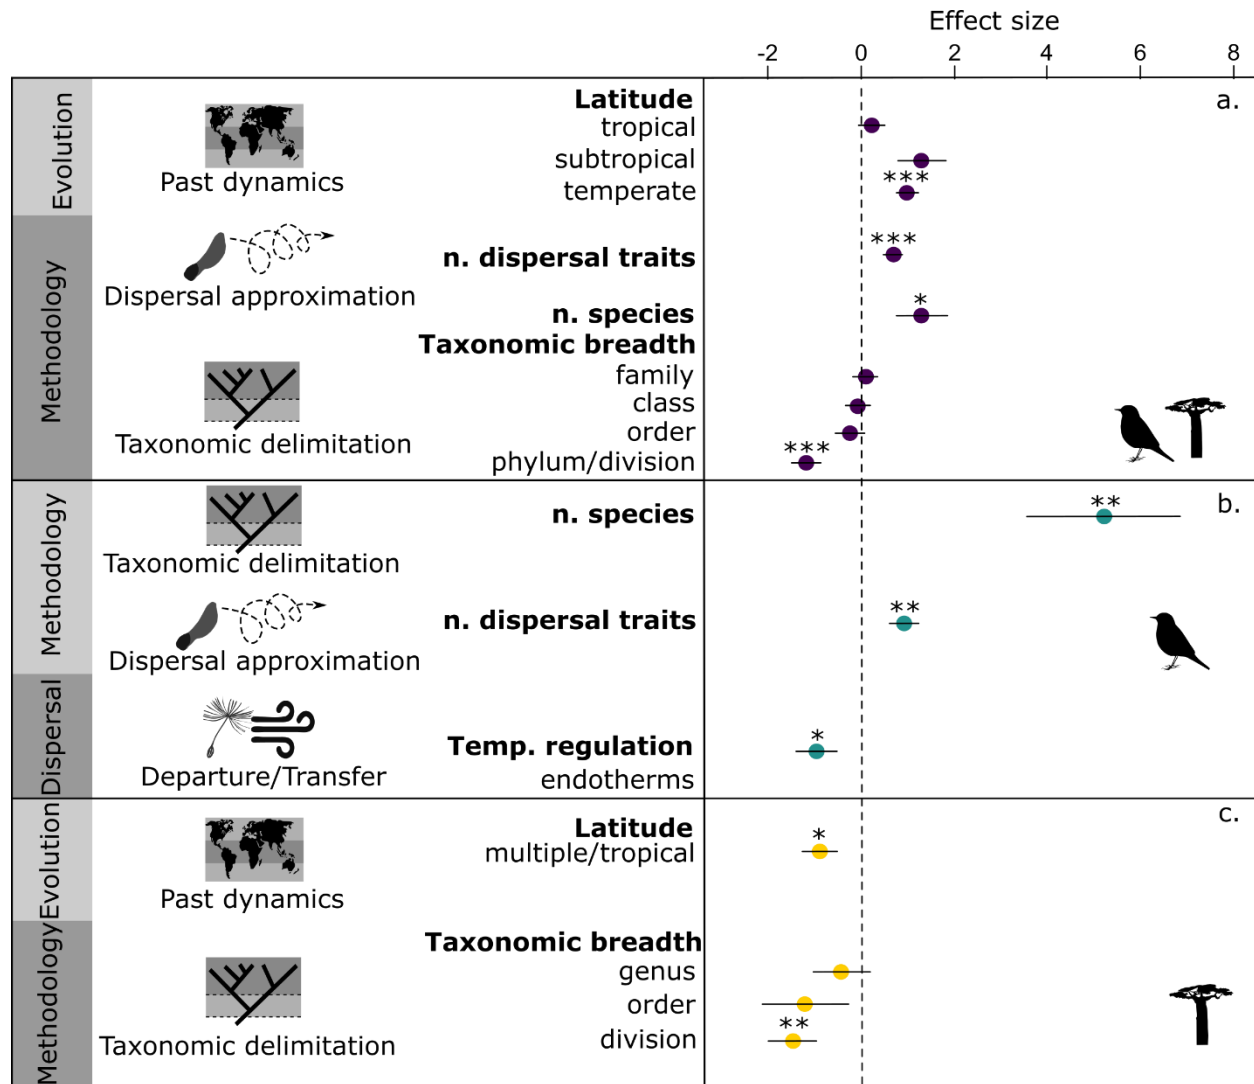

340

341

342 **Fig. 3.** Determinants of the dispersal-range size relationship. Outcomes of the global model (a)  
 343 and models for animals (b) and plants (c) examining the effect of 19 variables (moderators) on the  
 344 dispersal-range size relationship across 83 studies and 478 relationships. We show the inferred  
 345 effect size of standardize predictor variables that remained significant in the final GLMM models  
 346 (or GLM for plants). Reference levels for the categorical variables are in (a) multiple latitudes (for  
 347 latitude, i.e. vs. tropical, subtropical, temperature) and class (for taxonomic breadth, i.e. vs. family,  
 348 genus, order, phylum/division); in (b) area for range size measurement (vs. units/categories/linear/percentage) and ectotherm for temperature regulation (vs. endotherm); and  
 349 in (c) family for taxonomic breadth (vs. family, class, division). Standard errors around the mean  
 350 estimates and significance level (\* <0.01, \*\* <0.001, \*\*\* <0.0001) of the effect are indicated. n.  
 351 = ‘number of’.  
 352



353 **The number of species effect on the dispersal - range size relationship**

354 Including a large number of species is advantageous for various reasons. Besides increasing the  
355 statistical power of the study, including more species may also capture a larger variation in both  
356 dispersal-related traits and range sizes essential to capture the relationship. The number of species  
357 used to examine the dispersal-range size relationship across studies ranged from 5 (for reef fishes;  
358 Zapata & Herrón 2003 and Lester & Ruttenberg 2005) to 10,338 (for birds; Sheard et al. 2020). A  
359 relatively small sample size (i.e., few species investigated), can result from a) study objective, such  
360 as the focus on a particular genus that comprises few species, or from b) data limitations, e.g.  
361 because trait data are only available for a subset of the species of interest. While data limitations  
362 are understandable because it is often difficult to gather information for all species in a large, wide-  
363 spread, species-rich clade, it may also come with the risk that the subsample of species and traits  
364 are biased and thus not representative for our understanding of the relationship between dispersal  
365 and range size. This may lead to biased outcomes (Alzate et al. 2019a), even after data imputation  
366 to resolve data gaps (Johnson et al 2021). It is noteworthy that a small sample size might be  
367 sufficient if the species pool is also small, so the level of completeness might be the critical issue  
368 here. However, we were not able to evaluate this because most studies did not report on sampling  
369 completeness.

370

371 **The number of dispersal-related traits effect on the dispersal - range size relationship**

372 Our results also indicated that including multiple dispersal-related traits increased the probability  
373 of finding a positive dispersal-range size relationship. However, 80% of the studied relationships  
374 (383/476) included only a single dispersal trait. As dispersal is an emergent process that results  
375 from the combined effects of multiple dispersal characteristics (Ronce 2007, Bonte et al. 2012),  
376 including multiple traits may capture the complexity of dispersal better, and thus increase the  
377 probability of finding a positive dispersal-range size relationship.

378

379

380

## 381 **The biogeographical effect on the dispersal-range size relationship**

382 We also found that studies performed exclusively in temperate or subtropical regions showed more  
383 positive associations between dispersal-related traits and range size than studies performed  
384 exclusively in the tropics or that included multiple latitudes (Fig. 3). This suggests that (current)  
385 species range sizes in tropical organisms may be more independent from dispersal than in  
386 subtropical and temperate regions, and supports the hypothesis (Table 1) that species in tropical  
387 regions may have had more opportunity to attain and persist in their maximum range sizes  
388 compared to temperate species, because range sizes have not been altered as much by past  
389 environmental change (e.g., during the Quaternary period, such as lack of glaciations) (Svenning  
390 & Skov 2004) and time for range expansion. Indeed, if species in temperate regions are still  
391 spreading from their last glacial maximum refugia, their ranges might be smaller than their  
392 potential ranges (Svenning et al. 2008), and dispersal-related traits might be more directly affecting  
393 range sizes compared to those in tropical regions.

394 Alternatively, differences in evolutionary rates between temperate and tropical regions may  
395 explain the observed discrepancy in the dispersal-range size relationship. It has been argued that  
396 higher temperatures in the tropics accelerate evolutionary and ecological change (e.g., shorter  
397 generations times, fast mutation and selection rates), which may lead to increased speciation rates  
398 (Brown 2014). Higher speciation rates would negatively affect species range sizes, as new species  
399 rapidly arise, generally attaining a small range, and then give birth to new species again, thereby  
400 making them ‘ephemeral’ (Lester et al. 2007, Sheth et al. 2020). Therefore, in tropical regions  
401 there might be more species with small ranges independent of their dispersal abilities. This may  
402 be exacerbated by more narrow, specialized niches of tropical species that hinder the increase of  
403 range size and thus foster isolation, reproductive isolation and speciation (Janzen 1967). One way  
404 to circumvent this effect of evolution, is to consider species age (or evolutionary rates) directly  
405 when assessing the dispersal-range size relationship. Even though species age did not come out as  
406 a significant contributor in our analysis, we cannot discard its importance, because only 15 (1 in  
407 plants, 14 in animals) out of the 475 relationships considered species age.

408 Our results also suggested that studying multiple latitudes simultaneously prevents to find positive  
409 dispersal-range size relationships. This might be particularly relevant when combining latitudes  
410 for which the dispersal-range size relationship is different, like tropical vs. temperate regions

411 together. Although a possible solution to circumvent this problem would be to correct for latitude,  
412 our results showed that correcting for latitude does not increase the chance of finding a positive  
413 dispersal-range size relationship. Nevertheless, only 30% of the relationships included a sort of  
414 latitude correction by either explicitly correcting for latitude (17 relationships) or restricting the  
415 study to a single latitudinal zone (107 relationships).

416

### 417 **The taxonomic effect on the dispersal-range size relationship**

418 We found that studies that included species that can only be grouped into a high taxonomic level  
419 such as ‘phylum’ or ‘division’ found less often positive dispersal-range size relationships than  
420 studies that examined species within lower taxonomic levels (‘family’, ‘order’, ‘class’). Our  
421 separate analyses for plants and animals show that this effect is primarily driven by studies on  
422 plants, in which there was a clear distinction between e.g. ‘angiosperm-wide’ studies (126/159  
423 relationships, in contrast to 10/298 relationships in animals that was at ‘phylum’ or higher  
424 taxonomic level), versus those performed for a specific ‘family’ or ‘genus’. This suggests that the  
425 disparity of dispersal-range size relationships when including plant (or animal) lineages that are  
426 phylogenetically distantly related and may therefore differ to a large extent in the traits that capture  
427 their dispersal ability (e.g., small seeds for wind-dispersed taxa, large seeds for animal-dispersed  
428 taxa, Table 2), will obscure or erase a relationship between dispersal and range size. In addition,  
429 including a clade in which many species are missing may also simply bias the initial dataset  
430 towards e.g. well-sampled species with relatively large range sizes. This means that a clear  
431 hypothesis and expectation on how dispersal affects range size in a studied clade is essential. In  
432 addition, including phylogenies to control for clade differences could provide a solution. We found  
433 that only 24% and 44% of dispersal-range size relationships that have been performed on animals  
434 and on plants, respectively, explicitly considered phylogenetic relationships. Even though  
435 phylogenetic correction was not selected in our final statistical model, we should be aware that we  
436 may not have had the statistical power to detect its real effect.

437

438

439

## 440 **Dispersal-range size moderators in animals vs. plants**

441 Our results confirmed our hypothesis that a positive dispersal-range size relationship is less  
442 common for endotherms than for ectotherms (Table 1, Fig. 3, Table S2 Supple. Mat.), possibly  
443 because endotherms are less affected by niche limitation than ectotherms due to broad thermal  
444 tolerances, allowing them to attain and persist in larger ranges more easily. Indeed, the ‘thermal  
445 plasticity hypothesis’ proposes that high metabolic rates increase thermal tolerance, and the  
446 ‘energy constraint hypothesis’ that due to higher and sustained levels of energy requirements,  
447 organisms with high metabolic rates need to forage farther and with lower densities, resulting in  
448 larger home ranges and range sizes (Pie et al. 2021). Even though endo- and ectotherms might not  
449 differ in the dispersal capacities required during the transfer phase of dispersal, endothermy might  
450 have an advantage during settlement and establishment (the third phase of dispersal). If  
451 endothermy has allowed species to attain range sizes that are larger than predicted by their  
452 dispersal ability only, this might explain why we find fewer positive relationships between  
453 dispersal and range size. Note that a model including latitude instead of temperature regulation has  
454 a similarly good model fit (Table S1, S2 Suppl. Mat).

## 455 **Final remarks**

456 In less than a century, macroecology has shed light on our understanding of species distribution  
457 patterns and about the processes and mechanisms governing them, at least from a theoretical point  
458 of view. Nowadays, we know that dispersal is a central process driving macroecological and  
459 macroevolutionary patterns in complex ways (e.g., Onstein et al. 2017, Alzate et al. 2019c, Sheard  
460 et al. 2020), but we still have not reached a consensus, based on empirical evidence, whether  
461 dispersal will positively affect geographical range sizes, or whether other variables, such as  
462 physiological tolerance (Pie et al. 2021), are more relevant for range size expansion, or even  
463 interact with aspects of the dispersal process (as shown here for endo- vs. ectotherms). Here, we  
464 show that differences between studies are largely responsible for different dispersal-range size  
465 relationship outcomes, which leads us to the following conclusions.

466 First of all, we need a better understanding of the dispersal process and envision it as a three-stage  
467 process (departure, transfer and settlement), with multiple traits (morphological, behavioral,  
468 physiological or life-history) acting differently in each of these stages (Clobert et al. 2012, Laube  
469 et al. 2013). It is important to be aware that many dispersal-related traits, which lead to net

470 displacement, may be selected for functions other than dispersal *per se* (Burgess et al. 2005). In  
471 benthic marine organisms, dispersal-related traits (e.g., pelagic larvae, spawning mode) are often  
472 a by-product of traits selected for feeding, as part of the egg size-number trade-off, predation  
473 avoidance or retention of propagules (Burgess et al. 2015). In plants dispersal related traits, like  
474 seed size and plant height, can evolve as a result of the seed size-seed number trade-off and as to  
475 avoid competition for sunlight (Burgess et al. 2015). In animals, for which one type of locomotion  
476 is used for several ecological functions, dispersal can result from movement for foraging,  
477 exploration, mate and shelter seeking (Burgess et al. 2015). Regardless of whether traits are  
478 selected for dispersal or are an eco-evolutionary by-product, using a more complete picture of  
479 dispersal will allow us to capture its complexity in a more realistic manner and to better explain  
480 species geographical ranges. We should aim to use multiple dispersal-related traits, dispersal  
481 syndromes or co-variations of multiple dispersal-related traits (a multivariate dispersal phenotype)  
482 instead of using individual traits as dispersal proxies (Ronce & Clobert 2012).

483 Second, we propose ‘evolution’ and past dynamics as the fourth stage of the dispersal-range size  
484 paradigm. There is a lack of integration between macroecology and macroevolution (McGill et al.  
485 2019); paleontological studies have pointed out the intricate relationship between dispersal, range  
486 size, speciation, extinction and species ages (Jablonski 1986), but very few studies have considered  
487 time for dispersal and range expansion (e.g., species age) or speciation/extinction dynamics when  
488 examining determinants of range size. Possibly, this is because suitably large and complete  
489 phylogenies, and reliable molecular clock models to estimate diversification rates, have been  
490 lacking until recently. In addition, past changes in paleoclimates, landscape connectivity, orogeny,  
491 and barriers, all have major impacts on dispersal and range size (Hagen et al. 2021), and should  
492 ideally be considered to fully capture this fourth temporal dimension to the dispersal-range size  
493 relationship. Finally, understanding the distribution of ranges, niche widths (e.g., right or left  
494 skewed), level of specialization, and distribution of niche properties (i.e., ecological opportunity  
495 for range expansion) within a studied system/clade, may allow the dissection of ecological and  
496 evolutionary processes influencing the dispersal-range size relationship.

497

498 **Acknowledgments**

499 The authors acknowledge the support of iDiv funded by the German Research Foundation (DFG  
500 FZT 118, 202548816), specifically funding through sDiv, the Synthesis Centre of iDiv. We thank  
501 sDiv members, specially Roberto Rozzi, Alex Zizka and Juan Carvajal for lively discussion during  
502 this project. We thank Dries Bonte and Fons van der Plas for their useful comments and feedbacks  
503 on a previous version of this manuscript.

504 Map author: By Petr Dlouhý - World Map Blank.svg, Public Domain,  
505 <https://commons.wikimedia.org/w/index.php?curid=984944>

506

507

## 508 References

- 509 1. Alzate, A., van der Plas, F., Zapata, F.A., Bonte, D. & Etienne, R.S. 2019a. Incomplete  
510 datasets obscure associations between traits affecting dispersal ability and geographic  
511 range size of reef fishes in the Tropical Eastern Pacific. *Ecology and Evolution*. 9: 1567–  
512 1577.
- 513 2. Alzate, A., Etienne, R.S. & Bonte, D. 2019b. Experimental island biogeography  
514 demonstrates the importance of island size and dispersal for the adaptation to novel  
515 habitats. *Global Ecology and Biogeography*. 28: 238– 247.
- 516 3. Alzate, A, Janzen, T, Bonte, D, Rosindell, J, Etienne, RS. 2019c. A simple spatially explicit  
517 neutral model explains the range size distribution of reef fishes. *Global Ecol Biogeogr*. 28:  
518 875– 890.
- 519 4. Blackburn, T.M. & Gaston, K.J. 1998. Some methodological issues in macroecology. *The*  
520 *American Naturalist*. 15(1): 68-83.
- 521 5. Böhning-Gaese, K., Caprano, T., van Ewijk, K. & Veith, M. 2006. Range Size:  
522 Disentangling Current Traits and Phylogenetic and Biogeographic Factors. *Am. Nat.*  
523 167(4): 555-567.
- 524 6. Bonte, D., Van Dyck, H., Bullock, J.M., Coulon, A., Delgado, M., Gibbs, M., Lehouck,  
525 V., Matthysen, E., Mustin, K., Saastamoinen, M., Schtickzelle, N., Stevens, V.M.,  
526 Vandewoestijne, S., Baguette, M., Barton, K., Benton, T.G., Chaput-Bardy, A., Clobert, J.,  
527 Dytham, C., Hovestadt, T., Meier, C.M., Palmer, S.C.F., Turlure, C. & Travis, J.M.J. 2012.  
528 Costs of dispersal. *Biological Reviews*. 87: 290-312
- 529 7. Brown, J.H. 2014. Why are there so many species in the tropics? *Journal of Biogeography*.  
530 41(1): 8-22.
- 531 8. Brown, J.H. & Kondric-Brown, A. 1977. Turnover rates in insular biogeography: effects  
532 of immigration on extinction. *Ecology*. 58: 445–449.
- 533 9. Brown, J.H., Stevens, G.C., & Kaufman, D.M. 1996. The geographic range: size, shape,  
534 boundaries, and internal structure. *Annual Review of Ecology and Systematics*. 27(1): 597-  
535 623
- 536 10. Burgess, S. C., Baskett, M. L., Grosberg, R. K., Morgan, S. G. & Strathmann, R. R. 2015.  
537 When is dispersal for dispersal? Unifying marine and terrestrial perspectives. *Biological*  
538 *Reviews*, 91(3), 867-882.
- 539 11. Chichorro, F., Juslén, A. & Cardoso, P. 2019. A review of the relation between species  
540 traits and extinction risk. *Biological Conservation*. 237:220-229.
- 541 12. Clobert, J., Baguette, M., Benton, T.G. & Bullock, J.M. 2012. Dispersal ecology and  
542 evolution. Oxford University Press. 462 p.
- 543 13. Dorie, V., Bates, D., Maechler, M., Bolker, B. & Walker, S. 2021. Bayesian Linear Mixed-  
544 Effects Models. V1.0-5. <https://github.com/vdorie/blme>
- 545 14. Fox, J. & Weisberg, S. 2019. *An R Companion to Applied Regression*, Third edition. Sage,  
546 Thousand Oaks CA. <https://socialsciences.mcmaster.ca/jfox/Books/Companion/>.

- 547 15. Gaston, K.J. & Blackburn, T.M. 1996. Range size - body size relationships: evidence of  
548 scale dependence. *Oikos*. 75(3):479-485.
- 549 16. Gaston, K. J. 2003. The structure and dynamics of geographic ranges. Oxford University  
550 Press, Oxford.
- 551 17. Gaston, K.J. & Fuller, R.A. 2009. The sizes of species' geographic ranges. *Journal of*  
552 *Applied Ecology*, 46: 1-9.
- 553 18. Gaston, K.J. 2009. Geographic range limits: achieving synthesis. *Proc. R. Soc. B.* 276:  
554 1395-1406.
- 555 19. Green, A.J., Baltzinger, C. and Lovas-Kiss, Á. (2021), Plant dispersal syndromes are  
556 unreliable, especially for predicting zoochory and long-distance dispersal. *Oikos*.  
557 <https://doi.org/10.1111/oik.08327>
- 558 20. Haffer, J. 1969. Speciation in Amazonian forest birds. *Science*. 165(3889): 131-137.
- 559 21. Hagen O, Flück B, Fopp F, Cabral JS, Hartig F, et al. (2021) gen3sis: A general engine for  
560 eco-evolutionary simulations of the processes that shape Earth's biodiversity. *PLOS*  
561 *Biology* 19(7): e3001340.
- 562 22. Hanski, I., Kouki, J. & Halkka, A. 1993. Three explanations of the positive relationship  
563 between distribution and abundance of species. In: *Species Diversity in Ecological*  
564 *Communities: Historical and Geographical Perspectives* (eds Ricklefs, R.E. & Schluter,  
565 D.). University of Chicago Press, Chicago, pp. 108–116.
- 566 23. Hayes, J. P., Feldman, C. R. & Araújo, M.B. 2018. Mass-independent maximal metabolic  
567 rate predicts geographic range size of placental mammals. *Functional Ecology*. 32: 1194-  
568 1202.
- 569 24. Holt, R.D. 2003. On the evolutionary ecology of species' ranges. *Evol. Ecol. Res.* 5:159–  
570 78
- 571 25. Holt, R.D., Keitt, T.H., Lewis, M.A., Maurer, B.A. & Taper, M.L. 2005. Theoretical  
572 models of species' borders: single species approaches. *Oikos*. 108:18–27
- 573 26. Holt, R. D. & Gomulkiewicz, R. 1997. How does immigration influence local adaptation?  
574 A re-examination of a familiar paradigm. *The American Naturalist*, 149, 563-572.
- 575 27. Hufbauer, R.A., Szűcs, M., Kasyon, E., Youngberg, C., Koontz, M.J., Richards, C., Tuff,  
576 T. & Melbourne, B. A. 2015. Three types of rescue can avert extinction in a changing  
577 environment. *Proceedings of the National Academy of Sciences*. 112 (33): 10557-10562.
- 578 28. Jablonski, D. 1986. Larval ecology and macroevolution in marine invertebrates. *Bulletin*  
579 *of Marine Science*. 39(2): 565–587.
- 580 29. Janzen, D.H. 1967. Why mountain passes are higher in the tropics. *The American*  
581 *Naturalist*. 101(919): 233-249.
- 582 30. Johnson, T.F., Isaac, N.J.B., Paviolo, A. & González-Suárez, M. 2021. Handling missing  
583 values in trait data. *Global Ecology and Biogeography*. 30: 51-62.
- 584 31. Laube, I., Korntheuer, H., Schwager, M., Trautmann, S., Rahbek, C. & Böhning-Gaese, K.  
585 2013. Towards and more mechanistic understanding of traits and range sizes. *Global*  
586 *Ecology and Biogeography*. 22: 233-241.



- 587 32. Lester, S. E. & Ruttenberg, B. I. 2005. The relationship between pelagic larval duration  
588 and range size in tropical reef fishes: a synthetic analysis. *Proceedings of the Royal Society*  
589 *B*, 72, 585-591.
- 590 33. Lester, S. E., Ruttenberg, B. I., Gaines, S. D. & Kinlan, B. P. 2007. The relationship  
591 between dispersal ability and geographic range size. *Ecology Letters*, 10, 745–758.
- 592 34. Luiz, O. J., Allen, A. P., Robertson, D. R., Floeter, S. R., Kulbicki, M., Vigliola, L.,  
593 Becheler, R. & Madin, J. S. 2013. Adult and larval traits as determinants of geographic  
594 range size among tropical reef fishes. *Proceedings of the National Academy of Sciences*,  
595 110(41), 16498-16502.
- 596 35. Matthysen, E. 2012. Multicausality of dispersal: a review. In: Clobert, J., Baguette, M.,  
597 Benton, T.G. & Bullock, J.M. 2012. *Dispersal ecology and evolution*. Oxford University  
598 Press. pp 3-18.
- 599 36. McGill, B. J., Chase, J. M., Hortal, J., Overcast, I., Rominger, A. J., Rosindell, J., et al.  
600 (2019). Unifying macroecology and macroevolution to answer fundamental questions  
601 about biodiversity. *Glob. Ecol. Biogeogr.* 28(12):1925-1936.
- 602 37. Mora, C., Treml, E., Robert, J., Crosby, K., Roy, D. & Titterson, D. P. 2012. High  
603 connectivity among habitats precludes the relationship between dispersal and range size in  
604 tropical reef fishes. *Ecography*, 35(1), 89–96.
- 605 38. Olson, D.M., E. Dinerstein, E.D. Wikramanayake, N.D. Burgess, G.V.N. Powell, E.C.  
606 Underwood, J.A. D'Amico, I. Itoua, H.E. Strand, J.C. Morrison, C.J. Loucks, T.F. Allnutt,  
607 T.H. Ricketts, Y. Kura, J.F. Lamoreux, W.W. Wettengel, P. Hedao, & K.R. Kassem. 2004.  
608 *Terrestrial Ecoregions of the World: A New Map of Life on Earth* (PDF, 1.1M) *BioScience*  
609 51:933-938.
- 610 39. Onstein, R.E., Baker, W.J., Couvreur, T.L.P. et al. 2017. Frugivory-related traits promote  
611 speciation of tropical palms. *Nat Ecol Evol* 1, 1903–1911.
- 612 40. Onstein, R.E., Kissling, W.D., Chatrou, L.W., Couvreur, T.L.P., Morlon, H. & Sauquet, H.  
613 2019. Which frugivory-related traits facilitated historical long-distance dispersal in the  
614 custard apple family (Annonaceae)? *Journal of Biogeography*. 46: 1874– 1888.
- 615 41. Pie, M. R., Divieso, R. & Caron, F. S. 2021. Do geographic range sizes evolve faster in  
616 endotherms? *Evolutionary Biology*. <https://doi.org/10.1007/s11692-021-09537-x>
- 617 42. Purvis, A., Gittleman, J. L., Cowlshaw, G. & Mace, G. M. 2000. Predicting extinction risk  
618 in declining species. *Proc. R. Soc. Lond. B.* 267(1456):1947–1952.
- 619 43. Rangel, T.F.L.V.B. & Diniz-Filho, J.A.F. 2005. Neutral community dynamics, the mid-  
620 domain effect and spatial patterns in species richness. *Ecology Letters*. 8: 783-790.
- 621
- 622 44. Ronce, O. 2007. How does it feel to be like a rolling stone? Ten questions about dispersal  
623 evolution. *Ann. Rev. Ecol. Evol. Syst.* 38:231-253.
- 624 45. Ronce, O. & Clobert, J. 2012. Dispersal syndromes. In: Clobert, J., Baguette, M., Benton,  
625 T.G. & Bullock, J.M. (eds). *Dispersal ecology and evolution*. Oxford University Press. pp  
626 119-138.

- 627 46. Schurr, F.M., Midgley, G.F., Rebelo, A.G., Reeves, G., Poschlod, P. & Higgins, S.I. 2007.  
628 Colonization and persistence ability explain the extent to which plant species fill their  
629 potential range. *Global Ecology and Biogeography*. 16: 449-459.
- 630 47. Sexton, J. P., McIntyre, P. J., Angert, A. L. & Rice, K. J. 2009. Evolution and ecology of  
631 species range limits. *Annual Review of Ecology, Evolution and Systematics*, 40, 415-436.
- 632 48. Sheard, C., Neate-Clegg, M.H.C., Alioravainen, N., Jones, S.E.I., Vincent, C., MacGregor,  
633 H.E.A., Bregman, T.P., Claramunt, S. & Tobias, J. A. 2020. Ecological drivers of global  
634 gradients in avian dispersal inferred from wing morphology. *Nature Communications*. 11:  
635 2463.
- 636 49. Sheth, S.N., Morueta-Holme, N., Angert, A.L. 2020. Determinants of geographic range  
637 size in plants. *New Phytologist*. 226:650-665.
- 638 50. Spalding, M.D., Fox, H.E., Allen, G.R., Davidson, N., Ferdaña, S.A., Finlayson, M.,  
639 Halpern, B.S., Jorge, M.A., Lombana, A., Lourie, S.A., Martin, K.D., McManus, E.,  
640 Molnar, J., Recchia, C.A., & Robertson, J. 2007. Marine ecoregions of the world: a  
641 bioregionalization of coastal and shelf areas. *BioScience*. 57(7): 573-583.
- 642 51. Storch, D. & Šizling, A.L. 2008. The concept of taxon invariance in ecology: do diversity  
643 patterns vary with changes in taxonomic resolution? *Folia Geobotanica*. 43(3): 329-344.
- 644 52. Svenning, J.-C. & Skov, F. 2004. Limited filling of the potential range in European tree  
645 species. *Ecology Letters*, 7: 565-573.
- 646 53. Svenning, J.-C., Normand, S. & Skov, F. 2008. Postglacial dispersal limitation of  
647 widespread forest plant species in nemoral Europe. *Ecography*. 31: 316-326.
- 648 54. Thieltges, D.W., Hof, C., Borregaard, M.K., Dehling, M., Brändle, M., Brandl, R. &  
649 Poulin, R. 2011. Range size patterns in European freshwater trematodes. *Ecography*. 34:  
650 982-989.
- 651 55. Travis, J.M.J., Mustin, K., Bartoń, K.A., Benton, T.G., Clobert, J., Delgado, M.M.,  
652 Dytham, C., Hovestadt, T., Palmer, S.C.F., Van Dyck, H. and Bonte, D. (2012), Modelling  
653 dispersal: an eco-evolutionary framework incorporating emigration, movement, settlement  
654 behaviour and the multiple costs involved. *Methods in Ecology and Evolution*. 3: 628-641.
- 655 56. Varadhan, R., Borchers, H.W. & Bechard, V. 2020. *dfoptim: Derivative-Free*  
656 *Optimization*. R package version 2020.10-1.
- 657 57. Webb, T. J., & Gaston, K. J. (2000). Geographic range size and evolutionary age in birds.  
658 *Proc. R. Soc. B*. 267(1455): 1843–1850.
- 659 58. Willis, J.C. 1922. *Age and Area: a study in geographical distribution and origin of species*.  
660 Cambridge: Cambridge University Press.
- 661 59. Zapata, F. A. & Herrón, P. A. (2002) Pelagic larval duration and geographic distribution  
662 of tropical eastern Pacific snappers (Pisces: Lutjanidae). *Marine Ecology Progress Series*,  
663 230, 295–300.
- 664
